# Supplementary material for: Transcriptome analysis provides insight into the anti-diabetic mechanism of theaflavins in high-fat diet and streptozotocin-induced mice
Source: Royal Society of Chemistry journal article supplement (doi:10.1039/d1fo03856g), 2022-01-01
Supplement: d1fo03856g1.pdf [file d1fo03856g1.pdf]

| Gene                            | Forward primer (5'-3')   | Reverse primer (5'-3')   |
|---------------------------------|--------------------------|--------------------------|
| <i>Cel</i>                      | CGCCTGGAGGTTCTATTTCTTG   | GCCCTTGAAGATGTCAACAGA    |
| <i>Pla2g1b</i>                  | GTGTGGCAGTCCGCAATATG     | CCTGTCTAAGTCGTCCACTGG    |
| <i>Ptrb1</i>                    | ATGGCATTCCCTTGGCTTGTG    | GGATAGCATCCTCTCCGTTGAC   |
| <i>Pnlip</i>                    | CTGGGAGCAGTAGCTGGAAG     | AGCGGGTGTGATCTGTGC       |
| <i>Cckar</i>                    | CTTTTCTGCCTGGATCAACCT    | ACCGTGATAACCAGCGTGTC     |
| <i>Cela3b</i>                   | ATGCTCCGACTGCTGAGTTC     | AACAGCTTCCTCGCCATTGAC    |
| <i>Cingulin</i>                 | GCACCCTTCGTCGTAGTGG      | TGGACCCCAAAGGAGTCAGT     |
| <i>Claudin-1</i>                | TGCCCCAGTGGAAGATTTACT    | CTTTGCGAAACGCAGGACAT     |
| <i>PGC-1<math>\alpha</math></i> | CAAACCAACAACCTTTATCTCTCC | ACACTTAAGGTGCGTTCAATAGTC |
| <i>PGC-1<math>\beta</math></i>  | TGGAAAGCCCCTGTGAGAGT     | TTGTATGGAGGTGTGGTGGG     |
| <i>PRC</i>                      | AGTGGTTGGGGA AGTCGAAG    | CCTGCCGAGAGAGACTGAC      |
| <i><math>\beta</math>-actin</i> | TGACGTTGACATCCGTAAAG     | GAGGAGCAATGATCTTGATCT    |

Table S1. Primer sequences for quantitative real-time PCR
