# Supplementary material for: Transcriptome analysis provides insight into the anti-diabetic mechanism of theaflavins in high-fat diet and streptozotocin-induced mice
Source: Royal Society of Chemistry journal article supplement (doi:10.1039/d1fo03856g), 2022-01-01
Supplement: d1fo03856g2.xlsx [file d1fo03856g2.xlsx]

## Sheet: Sheet1
Table S2. Top 15 significantly enriched BP, MF and CC terms based on Gene Ontology (GO) analysis
BP	GOID	GO Term	DifGene	AllDifGene	GeneInGO	AllGene	P-Value	FDR	Enrichment	(-log10P)
	GO:0006936	muscle contraction	10	197	42	21946	3.09616e-12	2.1766e-09	26.5241	11.5092
	GO:0006937	regulation of muscle contraction	5	197	23	21946	1.63448e-06	0.000383012	24.2176	5.78662
	GO:0003009	skeletal muscle contraction	5	197	23	21946	1.63448e-06	0.000383012	24.2176	5.78662
	GO:0055008	cardiac muscle tissue morphogenesis	4	197	16	21946	1.05336e-05	0.00185129	27.8503	4.97742
	GO:0006603	phosphocreatine metabolic process	2	197	2	21946	8.01736e-05	0.00805172	111.401	4.09597
	GO:0018931	naphthalene metabolic process	2	197	2	21946	8.01736e-05	0.00805172	111.401	4.09597
	GO:0031448	positive regulation of fast-twitch skeletal muscle fiber contraction	2	197	2	21946	8.01736e-05	0.00805172	111.401	4.09597
	GO:0010866	regulation of triglyceride biosynthetic process	2	197	3	21946	0.000239096	0.0210106	74.2673	3.62143
	GO:0006508	proteolysis	16	197	670	21946	0.000377464	0.0294841	2.66032	3.42312
	GO:0007586	digestion	3	197	19	21946	0.000620852	0.04259	17.5896	3.20701
	GO:0006942	regulation of striated muscle contraction	2	197	5	21946	0.000787581	0.04259	44.5604	3.1037
	GO:0030241	skeletal muscle myosin thick filament assembly	2	197	5	21946	0.000787581	0.04259	44.5604	3.1037
	GO:0030240	skeletal muscle thin filament assembly	2	197	5	21946	0.000787581	0.04259	44.5604	3.1037
	GO:0048741	skeletal muscle fiber development	3	197	24	21946	0.00125469	0.0630034	13.9251	2.90146
	GO:0021978	telencephalon regionalization	2	197	7	21946	0.00163443	0.0718128	31.8289	2.78663
MF	GO:0003779	actin binding	18	190	343	21491	1.70631e-09	7.66135e-07	5.93583	8.76794
	GO:0004806	triglyceride lipase activity	4	190	14	21491	5.52838e-06	0.00091083	32.3173	5.2574
	GO:0016787	hydrolase activity	33	190	1629	21491	6.08573e-06	0.00091083	2.29137	5.21569
	GO:0052689	carboxylic ester hydrolase activity	6	190	64	21491	2.1608e-05	0.0024255	10.6041	4.66538
	GO:0008236	serine-type peptidase activity	9	190	181	21491	3.47245e-05	0.00286031	5.62428	4.45936
	GO:0004181	metallocarboxypeptidase activity	4	190	22	21491	3.82224e-05	0.00286031	20.5656	4.41768
	GO:0004252	serine-type endopeptidase activity	9	190	197	21491	6.70645e-05	0.00430171	5.16749	4.17351
	GO:0070080	titin Z domain binding	2	190	2	21491	7.77539e-05	0.00436394	113.111	4.10928
	GO:0008233	peptidase activity	15	190	550	21491	0.000118323	0.00575953	3.08483	3.92693
	GO:0051015	actin filament binding	7	190	126	21491	0.000131572	0.00575953	6.28392	3.88084
	GO:0046703	natural killer cell lectin-like receptor binding	3	190	12	21491	0.000141102	0.00575953	28.2776	3.85047
	GO:0051373	FATZ binding	2	190	3	21491	0.000231901	0.00748631	75.407	3.6347
	GO:0004948	calcitonin receptor activity	2	190	3	21491	0.000231901	0.00748631	75.407	3.6347
	GO:0004180	carboxypeptidase activity	4	190	35	21491	0.000250099	0.00748631	12.9269	3.60189
	GO:0016298	lipase activity	4	190	35	21491	0.000250099	0.00748631	12.9269	3.60189
CC	GO:0005576	extracellular region	36	199	1733	21760	2.74152e-06	0.000198787	2.27148	5.56201
	GO:0005615	extracellular space	29	199	1239	21760	3.07467e-06	0.000198787	2.55937	5.5122
	GO:0032982	myosin filament	4	199	12	21760	3.17213e-06	0.000198787	36.4489	5.49865
	GO:0005865	striated muscle thin filament	4	199	14	21760	6.32329e-06	0.000297195	31.2419	5.19906
	GO:0016459	myosin complex	6	199	53	21760	8.70915e-06	0.000327464	12.3789	5.06002
	GO:0005859	muscle myosin complex	3	199	6	21760	1.47662e-05	0.000462674	54.6734	4.83073
	GO:0030017	sarcomere	5	199	39	21760	2.72023e-05	0.00072518	14.0188	4.56539
	GO:0030016	myofibril	5	199	40	21760	3.08587e-05	0.00072518	13.6683	4.51062
	GO:0005861	troponin complex	3	199	8	21760	4.07894e-05	0.000852044	41.005	4.38945
	GO:0031225	anchored component of membrane	7	199	134	21760	0.000237352	0.00446222	5.71214	3.62461
	GO:0030018	Z disc	6	199	116	21760	0.000699315	0.0119519	5.65587	3.15533
	GO:0005579	membrane attack complex	2	199	7	21760	0.00169556	0.0235349	31.2419	2.77069
	GO:0042588	zymogen granule	2	199	7	21760	0.00169556	0.0235349	31.2419	2.77069
	GO:0070062	extracellular vesicular exosome	39	199	2651	21760	0.0017526	0.0235349	1.60865	2.75632
	GO:0005783	endoplasmic reticulum	21	199	1221	21760	0.00408025	0.0487341	1.88066	2.38931
BP: biological processes; MF: molecular functions, CC: cellular components
