# Supplementary material for: Transcriptome analysis provides insight into the anti-diabetic mechanism of theaflavins in high-fat diet and streptozotocin-induced mice
Source: Royal Society of Chemistry journal article supplement (doi:10.1039/d1fo03856g), 2022-01-01
Supplement: d1fo03856g3.xlsx [file d1fo03856g3.xlsx]

## Sheet: Sheet1
Table S3. Differential expressed genes (DEGs) involving in the nine significantly enriched KEGG pathways
PathwayID	PathwayTerm	QueryID	Description	Log2 Fold Change	P-Value	FDR	Enrichment
PATH:04972	Pancreatic secretion	2210010C04Rik	Protein 2210010C04Rik	10.7969	1.8888e-16	2.0588e-14	15.8147
PATH:04972	Pancreatic secretion	Atp2a1	Sarcoplasmic/endoplasmic reticulum calcium ATPase 1	7.63055	1.8888e-16	2.0588e-14	15.8147
PATH:04972	Pancreatic secretion	Cckar	Cholecystokinin receptor type A	7.24967	1.8888e-16	2.0588e-14	15.8147
PATH:04972	Pancreatic secretion	Cel	Carboxyl ester lipase, isoform CRA_a	11.3855	1.8888e-16	2.0588e-14	15.8147
PATH:04972	Pancreatic secretion	Cela2a	Chymotrypsin-like elastase family member 2A	8.58171	1.8888e-16	2.0588e-14	15.8147
PATH:04972	Pancreatic secretion	Cela3b	Chymotrypsin-like elastase family member 3B	11.4951	1.8888e-16	2.0588e-14	15.8147
PATH:04972	Pancreatic secretion	Clca1	Chloride channel calcium activated 1	-6.20443	1.8888e-16	2.0588e-14	15.8147
PATH:04972	Pancreatic secretion	Cpa1	Carboxypeptidase A1	11.8517	1.8888e-16	2.0588e-14	15.8147
PATH:04972	Pancreatic secretion	Cpa2	Carboxypeptidase A2	8.66178	1.8888e-16	2.0588e-14	15.8147
PATH:04972	Pancreatic secretion	Cpb1	Carboxypeptidase B1 (Tissue)	10.5368	1.8888e-16	2.0588e-14	15.8147
PATH:04972	Pancreatic secretion	Ctrb1	Chymotrypsinogen B	10.4145	1.8888e-16	2.0588e-14	15.8147
PATH:04972	Pancreatic secretion	Ctrl	Putative uncharacterized protein	9.27251	1.8888e-16	2.0588e-14	15.8147
PATH:04972	Pancreatic secretion	Pla2g1b	Phospholipase A(2)	13.7696	1.8888e-16	2.0588e-14	15.8147
PATH:04972	Pancreatic secretion	Pnlip	Pancreatic triacylglycerol lipase	10.0182	1.8888e-16	2.0588e-14	15.8147
PATH:04972	Pancreatic secretion	Pnliprp1	Inactive pancreatic lipase-related protein 1	8.93812	1.8888e-16	2.0588e-14	15.8147
PATH:04972	Pancreatic secretion	Pnliprp2	Pancreatic lipase-related protein 2	7.15215	1.8888e-16	2.0588e-14	15.8147
PATH:04972	Pancreatic secretion	Try5	Protein Try5	10.3259	1.8888e-16	2.0588e-14	15.8147
PATH:04974	Protein digestion and absorption	2210010C04Rik	Protein 2210010C04Rik	10.7969	1.53538e-08	8.36783e-07	11.1842
PATH:04974	Protein digestion and absorption	Cela2a	Chymotrypsin-like elastase family member 2A	8.58171	1.53538e-08	8.36783e-07	11.1842
PATH:04974	Protein digestion and absorption	Cela3b	Chymotrypsin-like elastase family member 3B	11.4951	1.53538e-08	8.36783e-07	11.1842
PATH:04974	Protein digestion and absorption	Col15a1	Collagen alpha-1(XV) chain	0.692701	1.53538e-08	8.36783e-07	11.1842
PATH:04974	Protein digestion and absorption	Cpa1	Carboxypeptidase A1	11.8517	1.53538e-08	8.36783e-07	11.1842
PATH:04974	Protein digestion and absorption	Cpa2	Carboxypeptidase A2	8.66178	1.53538e-08	8.36783e-07	11.1842
PATH:04974	Protein digestion and absorption	Cpb1	Carboxypeptidase B1 (Tissue)	10.5368	1.53538e-08	8.36783e-07	11.1842
PATH:04974	Protein digestion and absorption	Ctrb1	Chymotrypsinogen B	10.4145	1.53538e-08	8.36783e-07	11.1842
PATH:04974	Protein digestion and absorption	Ctrl	Putative uncharacterized protein	9.27251	1.53538e-08	8.36783e-07	11.1842
PATH:04974	Protein digestion and absorption	Try5	Protein Try5	10.3259	1.53538e-08	8.36783e-07	11.1842
PATH:04530	Tight junction	Actn2	Alpha-actinin-2	7.40455	5.67842e-05	0.00155393	5.89864
PATH:04530	Tight junction	Actn3	Alpha-actinin-3	4.05818	5.67842e-05	0.00155393	5.89864
PATH:04530	Tight junction	Cgn	Cingulin	0.826923	5.67842e-05	0.00155393	5.89864
PATH:04530	Tight junction	Cldn1	Claudin-1	0.822892	5.67842e-05	0.00155393	5.89864
PATH:04530	Tight junction	Myh1	Myosin, heavy polypeptide 1, skeletal muscle, adult	10.8275	5.67842e-05	0.00155393	5.89864
PATH:04530	Tight junction	Myh2	Protein Myh2	9.21188	5.67842e-05	0.00155393	5.89864
PATH:04530	Tight junction	Myh4	Skeletal muscle myosin heavy chain II-b transcript variant 6	9.08136	5.67842e-05	0.00155393	5.89864
PATH:04530	Tight junction	Myh7	Myosin, heavy polypeptide 7, cardiac muscle, beta	4.47936	5.67842e-05	0.00155393	5.89864
PATH:04975	Fat digestion and absorption	Cel	Carboxyl ester lipase, isoform CRA_a	11.3855	5.7025e-05	0.00155393	11.8499
PATH:04975	Fat digestion and absorption	Pla2g1b	Phospholipase A(2)	13.7696	5.7025e-05	0.00155393	11.8499
PATH:04975	Fat digestion and absorption	Pnlip	Pancreatic triacylglycerol lipase	10.0182	5.7025e-05	0.00155393	11.8499
PATH:04975	Fat digestion and absorption	Pnliprp1	Inactive pancreatic lipase-related protein 1	8.93812	5.7025e-05	0.00155393	11.8499
PATH:04975	Fat digestion and absorption	Pnliprp2	Pancreatic lipase-related protein 2	7.15215	5.7025e-05	0.00155393	11.8499
PATH:00561	Glycerolipid metabolism	Akr1b3	Aldose reductase	-0.838036	0.000146772	0.00319963	9.75877
PATH:00561	Glycerolipid metabolism	Cel	Carboxyl ester lipase, isoform CRA_a	11.3855	0.000146772	0.00319963	9.75877
PATH:00561	Glycerolipid metabolism	Pnlip	Pancreatic triacylglycerol lipase	10.0182	0.000146772	0.00319963	9.75877
PATH:00561	Glycerolipid metabolism	Pnliprp1	Inactive pancreatic lipase-related protein 1	8.93812	0.000146772	0.00319963	9.75877
PATH:00561	Glycerolipid metabolism	Pnliprp2	Pancreatic lipase-related protein 2	7.15215	0.000146772	0.00319963	9.75877
PATH:04270	Vascular smooth muscle contraction	Calcrl	Calcitonin receptor-like	-0.594191	0.00180299	0.0327542	4.62974
PATH:04270	Vascular smooth muscle contraction	Cyp4a12b	Protein Cyp4a12b	2.09933	0.00180299	0.0327542	4.62974
PATH:04270	Vascular smooth muscle contraction	Gna12	Guanine nucleotide-binding protein subunit alpha-12	0.657328	0.00180299	0.0327542	4.62974
PATH:04270	Vascular smooth muscle contraction	Mylk2	MCG3723	6.65506	0.00180299	0.0327542	4.62974
PATH:04270	Vascular smooth muscle contraction	Pla2g1b	Phospholipase A(2)	13.7696	0.00180299	0.0327542	4.62974
PATH:04270	Vascular smooth muscle contraction	Ramp1	Receptor activity-modifying protein 1	-0.745551	0.00180299	0.0327542	4.62974
PATH:05416	Viral myocarditis	Myh1	Myosin, heavy polypeptide 1, skeletal muscle, adult	10.8275	0.0120684	0.187922	4.47368
PATH:05416	Viral myocarditis	Myh2	Protein Myh2	9.21188	0.0120684	0.187922	4.47368
PATH:05416	Viral myocarditis	Myh4	Skeletal muscle myosin heavy chain II-b transcript variant 6	9.08136	0.0120684	0.187922	4.47368
PATH:05416	Viral myocarditis	Myh7	Myosin, heavy polypeptide 7, cardiac muscle, beta	4.47936	0.0120684	0.187922	4.47368
PATH:05146	Amoebiasis	Actn2	Alpha-actinin-2	7.40455	0.0313791	0.42754	3.34586
PATH:05146	Amoebiasis	Actn3	Alpha-actinin-3	4.05818	0.0313791	0.42754	3.34586
PATH:05146	Amoebiasis	C8b	Complement component 8 beta subunit	1.05453	0.0313791	0.42754	3.34586
PATH:05146	Amoebiasis	C9	Complement component C9	0.981148	0.0313791	0.42754	3.34586
PATH:05020	Prion diseases	C8b	Complement component 8 beta subunit	1.05453	0.0478794	0.575661	5.68797
PATH:05020	Prion diseases	C9	Complement component C9	0.981148	0.0478794	0.575661	5.68797
